# Supplementary material for: Probing self-associated intermolecular H-bonding using low-frequency SERS coupled with mid-IR SERS and DFT study: a case study of 2-MBA adsorbed on ZnO nanoparticles
Source: Royal Society of Chemistry journal article supplement (doi:10.1039/c9cp03124c), 2019-01-01
Supplement: c9cp03124c1.pdf [file c9cp03124c1.pdf]

## 1 Supplementary materials:

2 The geometry optimization of monomer and dimer in two different configurations (with S-H-  
3 --O interaction and with S---O interaction) is carried using B3LYP functional with 6-311 G(d,  
4 p). Thus, on the basis of DFT calculation (calculated energy and H-bond length), it is concluded  
5 that monomer and dimer with S---O interaction is more possible than with S-H---O interaction.  
6 Further, DFT calculation of monomer and dimer with S---O interaction is done using the basis  
7 set 6-311++G(d, p) as shown in Fig. S1 (V).

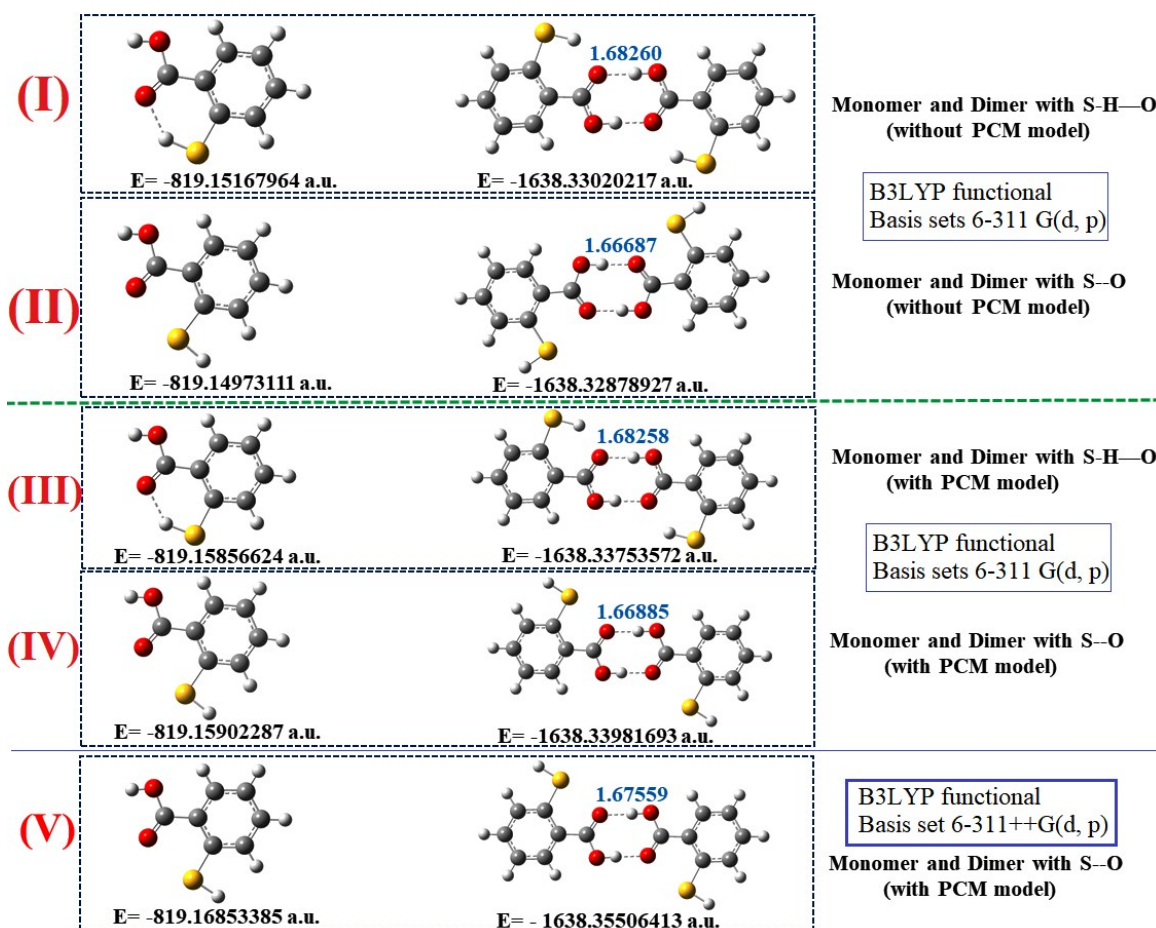

8

9 FIG. S1. Optimized geometry and corresponding energy of monomer and dimer calculated by  
10 DFT method.

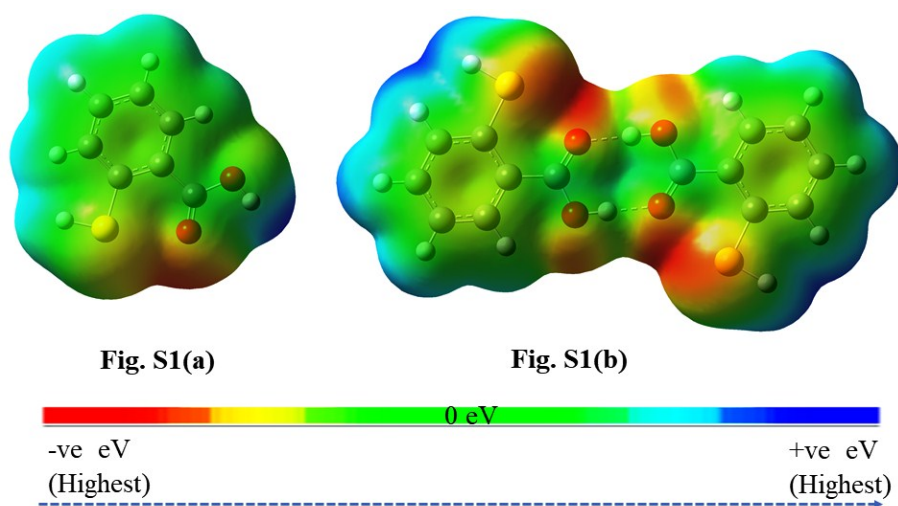

11 MEP value depicts the local electron density in molecule.

12 FIG. S2. DFT calculated MEP surface of (a) 2-MBA monomer, (b) self-associated 2-MBA  
 13 dimer, depicting the adsorption sites.

14

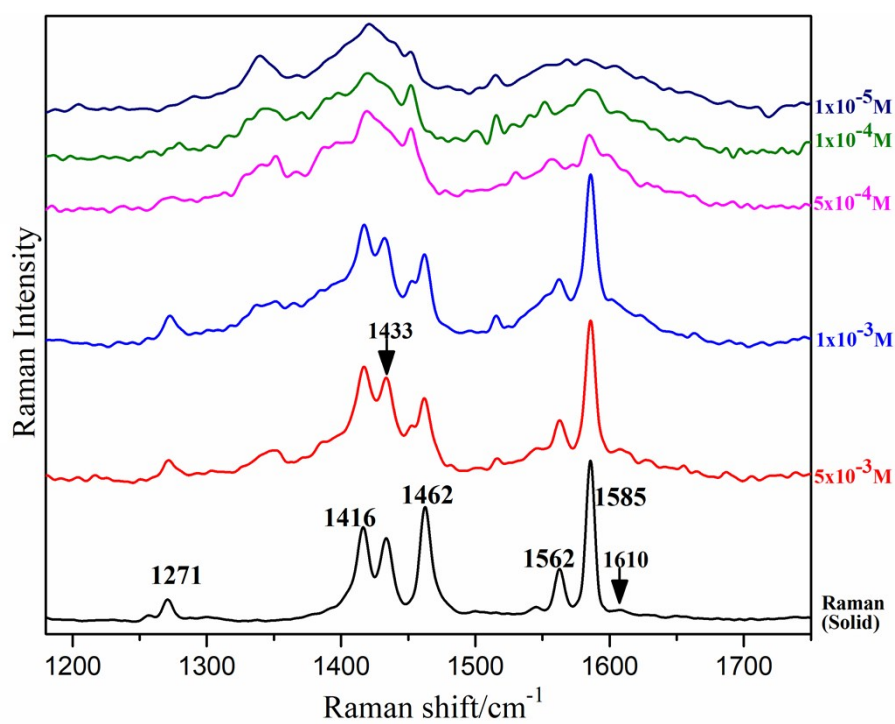

15

16 FIG. S3. Normal Raman and SERS spectra of 2-MBA in region 1180- 1750  $\text{cm}^{-1}$ .

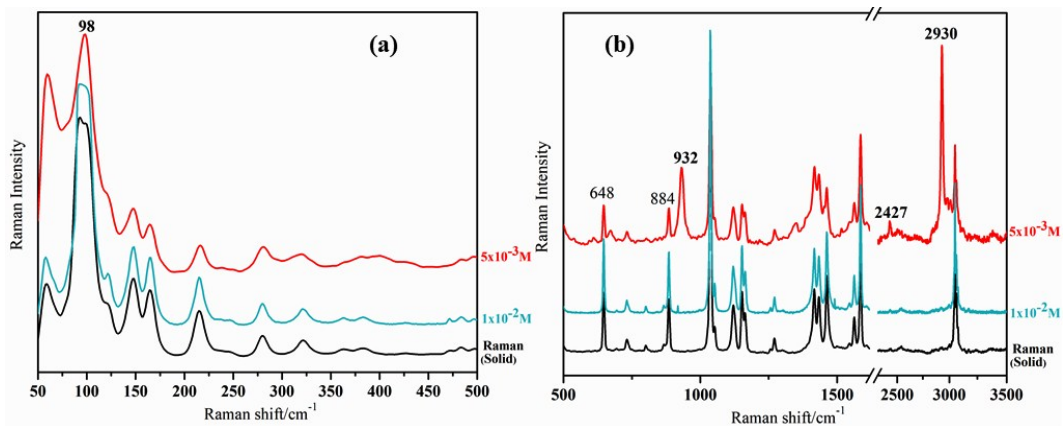

17

18 FIG. S4. Normal Raman and SERS spectra of 2-MBA at 0.01 M (a) region 50- 500  $\text{cm}^{-1}$  and  
 19 (b) region 500- 3500  $\text{cm}^{-1}$ .

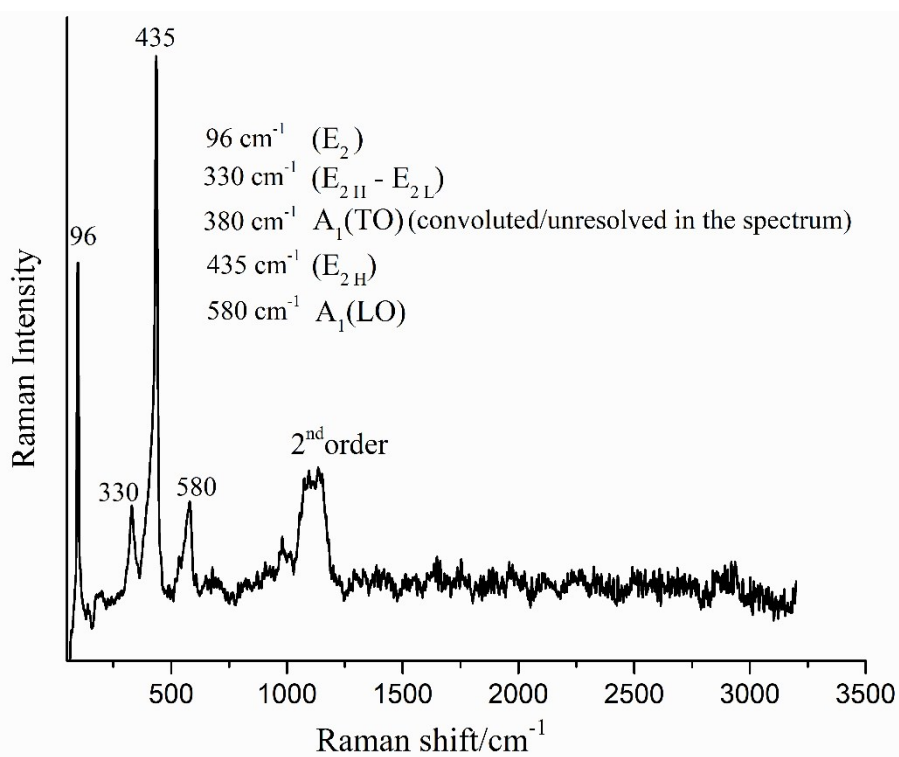

20

21 FIG. S5. Raman spectrum of bare ZnO nanoparticles

22

23

24

25

26

27

28

29

30

31 **TABLE S1. (Raman/SERS bands including with bands described in TABLE 1.)**

32 Observed normal Raman and SERS bands and their corresponding assignment for 2MBA monomer (MN) and  
 33 dimer (DM) with the help of DFT calculations using B3LYP functional and 6-311++G(d, p) basis set and earlier  
 34 reported literature [34-38]. The symmetry label of modes of 2-MBA monomer and dimer molecules are assigned  
 35 on the basis of group theory and DFT calculation.

| Raman<br>(2-MBA: MN) | SERS   | Symmetry*      | Vibrational Assignments<br>Monomer     | Vibrational Assignments<br>Dimer                             |
|----------------------|--------|----------------|----------------------------------------|--------------------------------------------------------------|
| 3064 (A')            | 3064   | A <sub>g</sub> | v(C-H)                                 | v(C-H)                                                       |
| 3051 (A')            | 3051   | A <sub>g</sub> | v(C-H)                                 | v(C-H)                                                       |
|                      | 2930   | A <sub>g</sub> |                                        | v(O-H---O); symmetric mode of H-bonded<br>carboxyl ring      |
|                      | 2427   | A <sub>g</sub> |                                        | v(S-H)                                                       |
| 1585 (A')            | 1585   | B <sub>u</sub> | v(CC); asymmetric                      | v(CC); asymmetric                                            |
| 1562 (A')            | 1562   | A <sub>g</sub> | v(CC); symmetric                       | v(CC); symmetric                                             |
| 1462 (A')            | 1462   | A <sub>g</sub> | v <sub>asym</sub> (CC) + δ(C-H)        | v <sub>asym</sub> (CC) + δ(C-H)                              |
| 1433 (A')            | 1433   | B <sub>u</sub> | v <sub>sym</sub> (CC) + δ(C-H)         | v <sub>sym</sub> (CC) + δ(C-H)                               |
| 1416 (A')            | 1416   | A <sub>g</sub> | v(CC)+ δ(C-H)+ δ(O-H)                  | v(CC)+ δ(C-H)+ δ(O-H)                                        |
|                      | 1347   | B <sub>u</sub> |                                        | asymmetric ring stretching + δ(O-H) <sub>carboxyl ring</sub> |
| 1271 (A')            | 1271   | A <sub>g</sub> | δ(O-H) + δ(C-H) + v(CC)                | δ(O-H) + δ(C-H) + v(CC)                                      |
| 1164 (A')            | 1164   | A <sub>g</sub> | δ(C-H)                                 | δ(C-H)                                                       |
| 1152 (A')            | 1152   | A <sub>g</sub> | δ(C-H) + v(CC)                         | δ(C-H) + v(CC)                                               |
| 1120 (A')            | 1120   | A <sub>g</sub> | δ(CCC)+ v(C-S) + v(C-OH)               | δ(CCC)+ v(C-S) + v(C-OH)                                     |
| 1053 (A')            | 1053   | A <sub>g</sub> | asymmetric ring breathing<br>mode      | asymmetric ring breathing mode                               |
| 1037 (A')            | 1037   | A <sub>g</sub> | symmetric ring breathing<br>mode       | symmetric ring breathing mode                                |
|                      | 932    | A <sub>u</sub> |                                        | γ(O-H); symmetric mode of H-bonded<br>carboxyl ring          |
| 884 (A'')            | 884    | B <sub>g</sub> | ω(C-H)                                 | ω(C-H)                                                       |
| 731 (A'')            | 731    | B <sub>g</sub> | ω(C-H)                                 | ω(C-H)                                                       |
|                      | 672    | A <sub>g</sub> | δ <sub>sym</sub> (COOH)+δ(CCC)+ v(C-S) | δ <sub>sym</sub> (COOH)+δ(CCC)+ v(C-S)                       |
| 648 (A')             | 648    | ---            | γ(O-H)                                 |                                                              |
| 496 (A'')            | 498    | B <sub>g</sub> | γ(CCC); asymmetric                     | γ(CCC); asymmetric                                           |
|                      | 398    | A <sub>u</sub> |                                        | γ(S-H); symmetric                                            |
| 384 (A'')            | 380    | B <sub>g</sub> | γ(S-H)                                 | γ(S-H); asymmetric                                           |
| 322 (A')             | 322    | A <sub>g</sub> | δ(CCC) <sub>bz ring</sub> + δ(CC=O)    | δ(CCC) <sub>bz ring</sub> + δ(CC=O)                          |
| 280 (A')             | 280    | A <sub>g</sub> | δ(HSPh-COOH) + δ(CCS)                  | δ(HSPh-COOH) + δ(CCS)                                        |
| 216 (A'')            | 216    | B <sub>g</sub> | δ(HSPh-COOH)                           |                                                              |
| 165 (A')             | 164    | A <sub>u</sub> | γ(HSPh-COOH); symmetric                |                                                              |
| 147 (A')             | 147    | B <sub>g</sub> | τ(HSPh-COOH)                           | τ(HSPh-COOH); symmetric                                      |
|                      | 139    | A <sub>u</sub> |                                        | τ(HSPh-COOH); asymmetric                                     |
| 122 (A'')            | 125    | A <sub>u</sub> | γ(HSPh-COOH); asymmetric               | γ(HSPh-COOH); asymmetric                                     |
|                      | 110    | A <sub>g</sub> |                                        | shear dimer stretching                                       |
| 100 (A')             | 98     | A <sub>g</sub> | t(-SH) + t(-COOH)                      | t(-SH) + t(-COOH)                                            |
| 92 (A')              |        |                | t(-SH)                                 |                                                              |
|                      | 90     | A <sub>g</sub> |                                        | shear dimer in-plane bending                                 |
| 58 (A'')             | 59 →64 | B <sub>g</sub> | t(-COOH) + t(-SH)                      | t(-COOH) + t(-SH)                                            |

36

37  $\nu$ : stretching,  $\delta$ : in-plane bending,  $\gamma$ : out-of-plane bending,  $\tau$ : torsion,  $\omega$ : wagging, t: twisting, HSPh:  
 38 2mercaptophenyl, sym: symmetric, asym: asymmetric, bz: benzene, {(MN)}/(DM)}: representation of symmetry  
 39 species of monomer (MN) and dimer (DM), Symmetry\*: symmetry label of corresponding Raman modes of  
 40 dimer

41

42

43

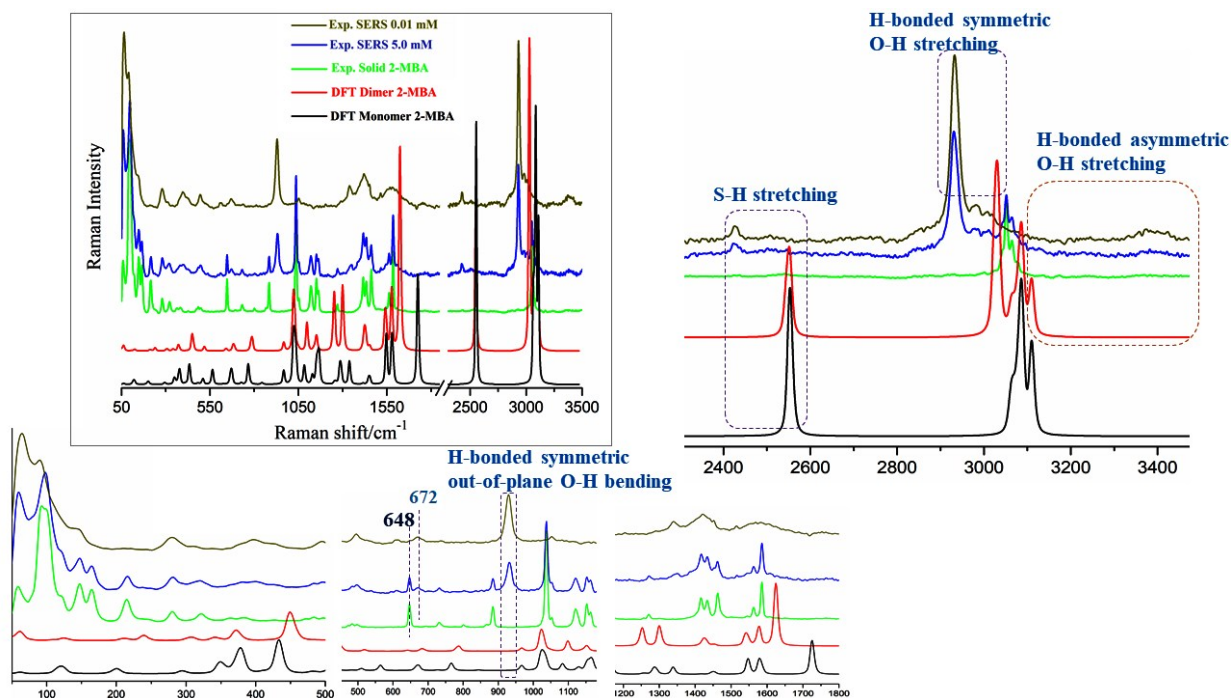

44

45 FIG. S6. Experimental Raman/SERS spectra of 2-MBA and DFT calculated Raman spectra  
 46 of monomer and dimer (The spectra is further splitted into four sections for precise analysis)

47
